# Supplementary material for: Female Breast Cancer Trends in Disaggregated Asian American Populations: Analysis of 2003-2017 U.S. Mortality Data
Source: Research Square preprint supplement (doi:10.21203/rs.3.rs-416046/v1), 2021-05-27
Supplement: Supplementary file 1 [file 33da25fcb7db4dcbb07929a3.docx]

**Supplementary Figure 3.** Breast cancer age-adjusted mortality rates per 100,000 for Asian American female decedents, by nativity (US-born vs foreign-born), National Vital Statistics System 2003-2017

|  | **Japanese** | | **Asian Indian** | | **Korean** | | **Chinese** | | **Filipino** | | **Vietnamese** | | **Aggregate Asian** | |
| --- | --- | --- | --- | --- | --- | --- | --- | --- | --- | --- | --- | --- | --- | --- |
| **US-born** | **Foreign born** | **US-born** | **Foreign born** | **US-born** | **Foreign born** | **US-born** | **Foreign born** | **US-born** | **Foreign born** | **US-born** | **Foreign born** | **US-born** | **Foreign born** |
| **2003** | 11.2  (7.9, 15.9) | 1.0  (0.5, 1.9) | 0.0  (0.0, 0.5) | 7.7  (5.7, 10.4) | 0.0  (0.0, 1.1) | 5.5  (3.7, 8.1) | 0.6  (0.3, 1.1) | 9.6,  (7.8, 11.7) | 0.2  (0.1, 0.6) | 16.2  (13.8, 19.0) | 0.0  (0.0, 0.7) | 6.0  (3.9, 9.0) | 0.9  (0.6, 1.2) | 14.2  (12.8, 15.7) |
| **2004** | 11.0  (7.8, 15.3) | 1.8  (1.2, 2.9) | 0.0  (0.0, 0.4) | 6.5  (4.7, 9.0) | 0.0  (NA, 0.6) | 8.0  (5.9, 10.8) | 0.4  (0.2, 0.8) | 10.4  (8.7, 12.4) | 0.1  (0.1, 0.5) | 16.9  (14.6, 19.6) | 0.0  (NA, 0.9) | 6.8  (4.7, 9.6) | 0.6  (0.5, 0.9) | 15.5  (14.1, 17.0) |
| **2005** | 13.6  (10.1, 18.0) | 1.5  (1.0, 2.4) | 0.0  0.0, 0.4) | 9.1  (7.0, 11.9) | 0.1  (0.0, 0.5) | 6.3  (4.6, 8.5) | 0.2  (0.1, 0.5) | 7.6  (6.3, 9.1) | 0.1  (0.0, 0.4) | 12.1  (10.4, 14.0) | 0.0  (NA, 0.6) | 3.4  (2.1, 5.1) | 0.6  (0.5, 0.8) | 12.2  (11.1, 13.4) |
| **2006** | 13.6  (8.0, 15.1) | 1.2  (0.8, 2.1) | 0.0  (NA, 0.5 ) | 8.3  (6.4, 10.7) | 0.3  (0.1, 0.9) | 7.1  (5.3, 9.4) | 0.3  (0.2, 0.5) | 5.8  (4.7, 7.1) | 0.1  (0.1, 0.4) | 12.0  (10.4, 13.9) | 0.0  (0.0, 0.4) | 2.8  (1.8, 4.3) | 0.7  (0.5, 0.9) | 11.1  (10.1, 12.2) |
| **2007** | 10.1  (7.0, 14.3) | 1.4  (0.9, 2.4) | 0.0  (0.0, 0.3) | 6.5  (4.9, 8.6) | 0.5  (0.1, 1.6) | 4.0  (2.7, 5.8) | 0.2  (0.1, 0.5) | 5.2  (4.2, 6.4) | 0.1  (0.0, 0.4) | 11.4  (9.8, 13.2) | 0.0  (NA, 0.6) | 2.6  (1.6, 4.0) | 0.6  (0.4, 0.8) | 9.9  (8.9, 10.9) |
| **2008** | 11.4  (7.8, 16.2) | 2.4  (1.6, 3.6) | 0.0  (0.0, 0.3) | 7.8  (6.0 10.1) | 0.2  (0.0, 1.0) | 4.9  (3.5, 6.6) | 0.3  (0.1, 0.6) | 6.6  (5.5, 7.9) | 0.1  (0.1, 0.4) | 10.7  (9.2, 12.4) | 0.0  (NA, 0.5) | 5.4  (3.8, 7.4) | 0.6  (0.4, 0.8) | 11  (10.0, 12.0) |
| **2009** | 10.1  (7.0, 14.4) | 1.3  (0.8, 2.3) | 0.1  (0.0, 0.4) | 6.2  (4.6, 8.1) | 0.0  (NA, 0.4) | 6.0  (4.5, 8.0) | 0.3  (0.2, 0.5) | 5.9  (4.8, 7.1) | 0.1  (0.0, 0.3) | 12.2  (10.7, 13.9) | 0.0  (NA, 0.4) | 4.8  (3.3, 6.8) | 0.3  (0.2, 0.5) | 11.3  (10.3, 12.3) |
| **2010** | 8.4  (5.9, 11.8) | 2.0  (1.4, 2.9) | 0.0  (NA, 0.2) | 6.9  (5.3, 8.8) | 0.0  (0.0, 0.4) | 6.0  (4.5, 7.9) | 0.4  (0.2, 0.7) | 5.9  (4.9, 7.0) | 0.2  (0.1, 0.5) | 12.7  (11.1, 14.4) | 0.0  (0.0, 0.4) | 4.7  (3.3, 6.6) | 0.5  (0.3, 0.7) | 11.2  (10.3, 12.2) |
| **2011** | 9.5  (6.8, 13.2) | 2.1  (1.5, 3.1) | 0.2  (0.0, 0.6) | 6.8  (5.3, 8.7) | 0.0  (0.0, 0.4) | 6.4  (4.8, 8.3) | 0.3  (0.1, 0.5) | 7.5  (6.4, 8.8) | 0.1  (0.0, 0.3) | 11.4  (10.0, 13.0) | 0.0  (0.0, 0.4) | 4.2  (2.9, 5.9) | 0.3  (0.2, 0.5) | 11.5  (10.6, 12.5) |
| **2012** | 8.0  (5.8, 11.1) | 1.6  (1.1, 2.5) | 0.0  (0.0, 0.2) | 8.9  (7.2 10.9) | 0.0  (NA, 0.4) | 5.7  (4.3, 7.5) | 0.2  (0.1, 0.4) | 6.2  (5.2, 7.3) | 0.1  (0.0, 0.4) | 10.4  (9.1, 11.9) | 0.0  (NA, 0.4) | 6.0  (4.5, 8.0) | 0.3  (0.2, 0.4) | 11.2  (10.3, 12.1) |
| **2013** | 7.2  (5.2, 10.0) | 1.8  (1.2, 2.8) | 0.0  (0.0, 0.3) | 7.8  (6.3, 9.7) | 0.0  (NA, 0.5) | 7.8  (6.1, 9.7) | 0.3  (0.2, 0.5) | 5.9  (5.0, 6.9) | 0.1  (0.1, 0.4) | 10.1  (8.8, 11.5) | 0.0  (0.0, 0.4) | 4.1  (2.9, 5.7) | 0.3  (0.2, 0.4) | 10.5  (9.7, 11.4) |
| **2014** | 8.0  (5.9, 11.0) | 1.7  (1.1, 2.6) | 0.0  (0.0, 0.2) | 9.6  (8.0 11.5) | 0.0  (0.0, 0.5) | 7.7  (6.1, 9.6) | 0.3  (0.2, 0.6) | 6.2  (5.3, 7.3) | 0.1  (0.1, 0.4) | 10.7  (9.5, 12.1) | 0.0  (0.0, 0.4) | 7.1  (5.6, 9.1) | 0.4  (0.3, 0.5) | 11.7  (10.8, 12.6) |
| **2015** | 10.4  (7.9, 13.7) | 2.2  (1.5, 3.3) | 0.0  (0.0, 0.2) | 8.5  (7.1 10.2) | 0.1  (0.0, 0.7) | 6.8  (5.3, 8.6) | 0.2  (0.1, 0.4) | 6.1  (5.3, 7.1) | 0.1  (0.0, 0.4) | 11.0  (9.8, 12.4) | 0.0  (0.0, 0.4) | 6.2  (4.7, 7.9) | 0.3  (0.2, 0.4) | 11.4  (10.6, 12.2) |
| **2016** | 6.5  (4.9, 9.0) | 1.7  (1.2, 2.8) | 0.0  (0.0, 0.2) | 7.7  (6.4, 9.3) | 0.0  (0.0, 0.5) | 7.4  (5.9, 9.2) | 0.3  (0.2, 0.6) | 6.0  (5.1, 6.9) | 0.3  (0.2, 0.6) | 6.0  (5.1, 6.9) | 0.0  (0.0, 0.4) | 6.9  (5.5, 8.7) | 0.4  (0.3, 0.6) | 10.6  (9.9, 11.5) |
| **2017** | 5.6  (4.1, 8.1) | 2.4  (1.8, 3.6) | 0.0  (0.0, 0.2) | 8.4  (7.0, 10.0) | 0.0  (0.0, 0.6) | 7.7  (6.2, 9.5) | 0.2  (0.1, 0.4) | 6.8  (5.9, 7.8) | 0.2  (0.1, 0.4) | 6.8  (5.9, 7.8) | 0.0  (0.0, 0.4) | 5.6  (4.3, 7.1) | 0.4  (0.3, 0.5) | 11.6  (10.8, 12.4) |
| **APC**  **(95% CI)** | -1.7  (-2.4 , -1.0) | 6.1  (0.8 11.4) | -6.9  (-68.0, 54.2) | 1.4  (-1.1 3.8) | -7.8  (-25.1, 9.3) | 1.6  (-0.5, 3.7) | -19.2  (-45.2, 6.8) | -1.6  (-3.2, -0.09) | 14.7  (-34.9, 64.4) | -1.5  (-2.5, -0.5) | 169.4  (-132.3, 471.1) | 1.1  (-0.6, 2.8) | -21.1  (-29.4, -12.8) | -1.3  (-2.6, -0.06) |
| **p-value** | 0.0001 | 0.03 | 0.8 | 0.2 | 0.3 | 0.1 | 0.1 | 0.04 | 0.5 | 0.005 | 0.2 | 0.2 | 0.0001 | 0.04 |
| **Count** | 923 | 626 | 39 | 1386 | 33 | 916 | 354 | 2544 | 259 | 3606 | 16 | 686 | 1624 | 9764 |
